# Supplementary material for: Propulsive Efficiency of Ridge/Inlet Configuration
Source: Hindawi journal article supplement (doi:10.1155/2018/7462024), 2018-08-19
Supplement: f1 [file 7462024.f1.pdf]

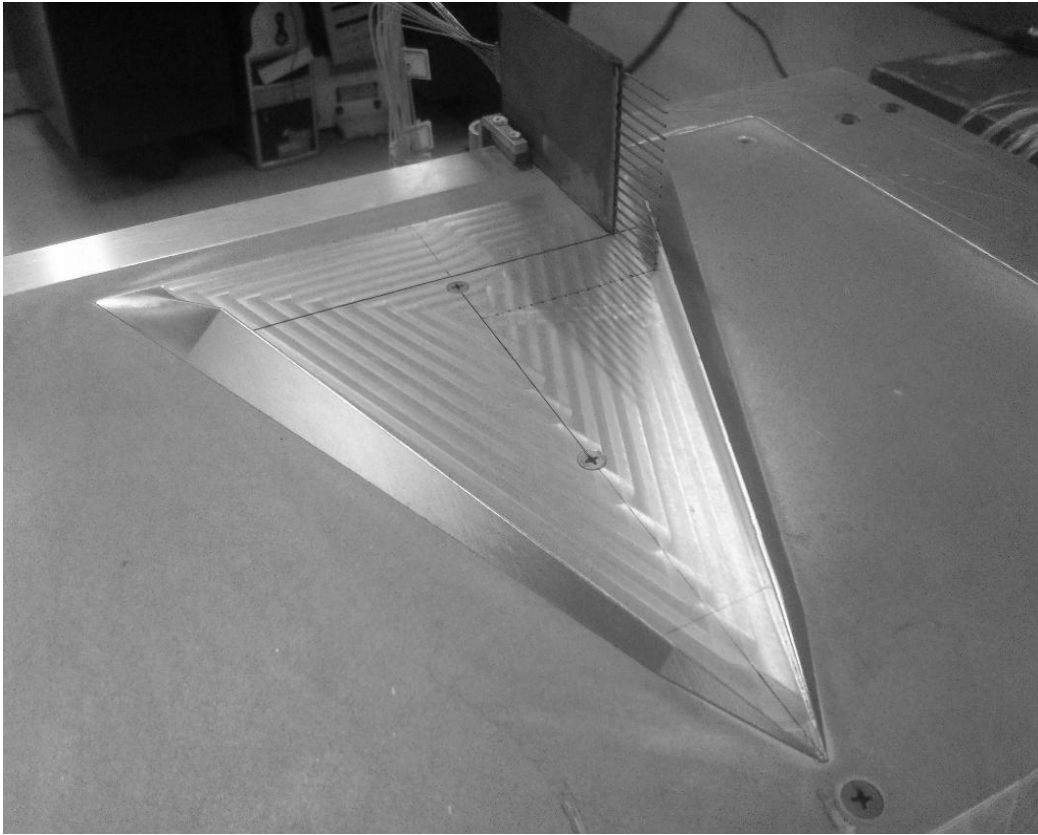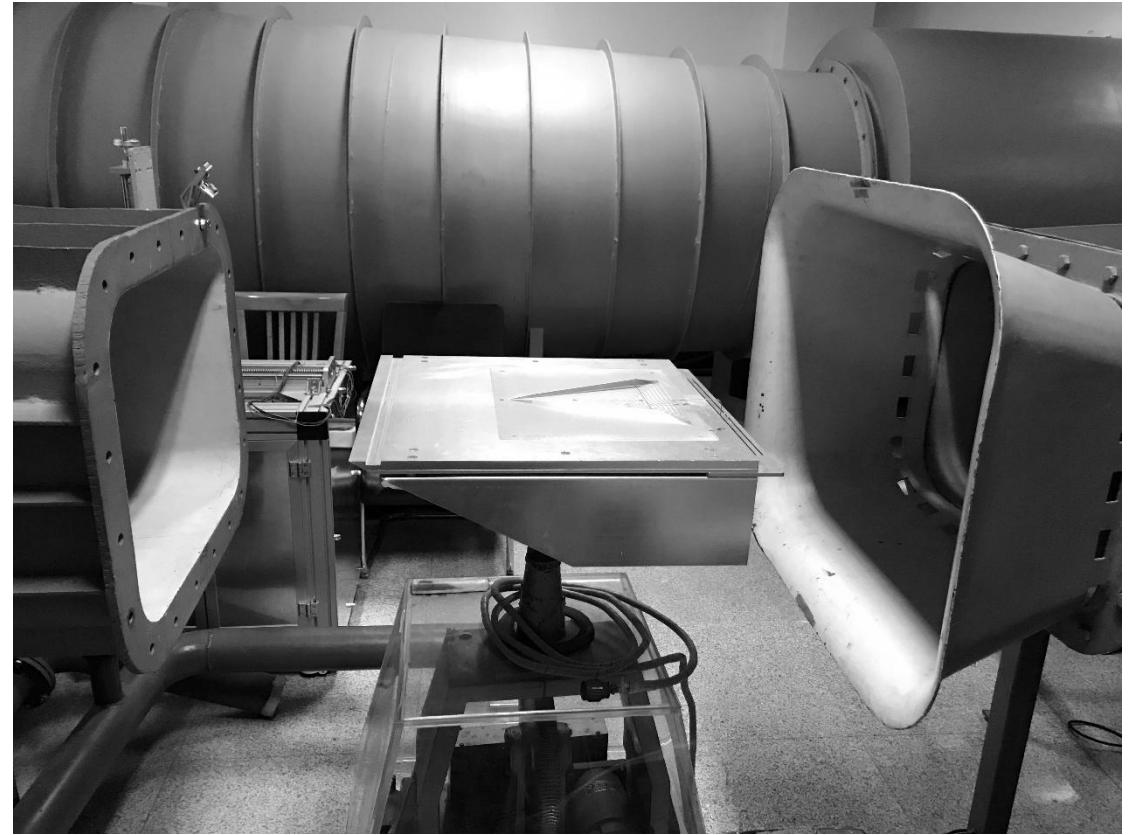

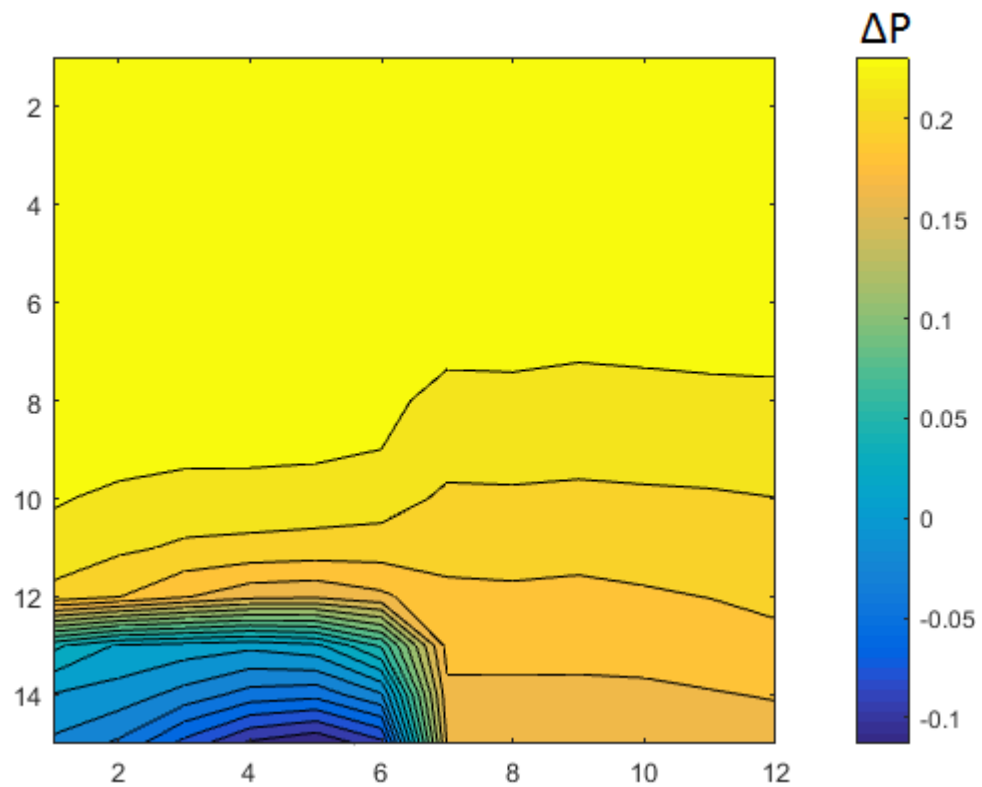

Time-averaged result at  $\Psi = 15^\circ$

Stability of the vortex at high yaw angle

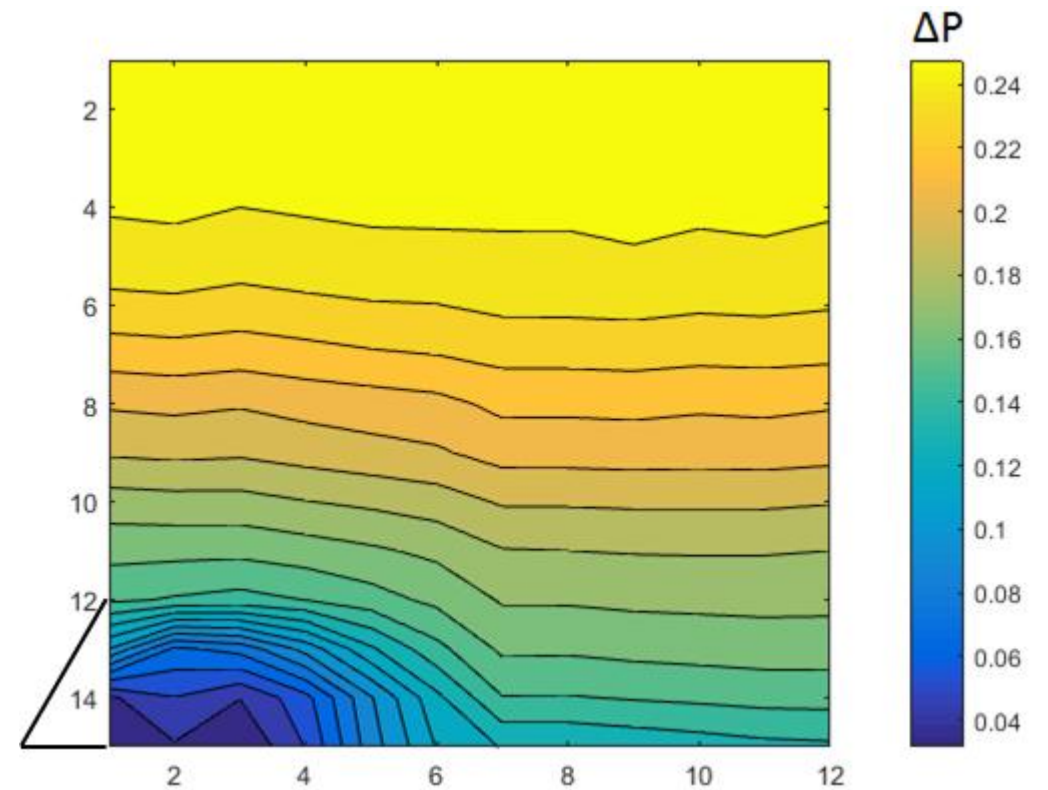

Time-averaged result at  $\Psi = 0^\circ$

Vortex structure at left half of the ridge surface
